# Supplementary material
Source: publisher site journal article supplement (https://www.dovepress.com/article/548141)
Supplement: Supplementary file 1 [file 548141%20Revised%20Supplementary%20Materials.docx]

**Supplementary Material**

**S1: Checklist for Reporting of Survey Studies (CROSS)**

| **Section/topic** | **Item** | **Item description** | **Reported on page #** |
| --- | --- | --- | --- |
| **Title and abstract** | | |  |
| Title and abstract | 1a | State the word “survey” along with a commonly used term in title or abstract to introduce the study’s design. | 1 |
| 1b | Provide an informative summary in the abstract, covering background, objectives, methods, findings/results, interpretation/discussion, and conclusions. | 1-2 |
| **Introduction** | | |  |
| Background | 2 | Provide a background about the rationale of study, what has been previously done, and why this survey is needed. | 2-3 |
| Purpose/aim | 3 | Identify specific purposes, aims, goals, or objectives of the study. | 3-4 |
| **Methods** | | |  |
| Study design | 4 | Specify the study design in the methods section with a commonly used term (e.g., cross-sectional or longitudinal). | 4 |
|  | 5a | Describe the questionnaire (e.g., number of sections, number of questions, number and names of instruments used). | 4-5 |
| Data collection methods | 5b | Describe all questionnaire instruments that were used in the survey to measure particular concepts. Report target population, reported validity and reliability information, scoring/classification procedure, and reference links (if any). | 5 |
| 5c | Provide information on pretesting of the questionnaire, if performed (in the article or in an online supplement). Report the method of pretesting, number of times questionnaire was pre-tested, number and demographics of participants used for pretesting, and the level of similarity of demographics between pre-testing participants and sample population. | 5 |
| 5d | Questionnaire if possible, should be fully provided (in the article, or as appendices or as an online supplement). | S1 |
| Sample characteristics | 6a | Describe the study population (i.e., background, locations, eligibility criteria for participant inclusion in survey, exclusion criteria). | 4 |
| 6b | Describe the sampling techniques used (e.g., single stage or multistage sampling, simple random sampling, stratified sampling, cluster sampling, convenience sampling). Specify the locations of sample participants whenever clustered sampling was applied. | 4 |
| 6c | Provide information on sample size, along with details of sample size calculation. | 4 |
| 6d | Describe how representative the sample is of the study population (or target population if possible), particularly for population-based surveys. | 4 |
| Survey  administration | 7a | Provide information on modes of questionnaire administration, including the type and number of contacts, the location where the survey was conducted (e.g., outpatient room or by use of online tools, such as SurveyMonkey). | 4-5 |
| 7b | Provide information of survey’s time frame, such as periods of recruitment, exposure, and follow-up days. | 5 |
| 7c | Provide information on the entry process:  –>For non-web-based surveys, provide approaches to minimize human error in data entry.  –>For web-based surveys, provide approaches to prevent “multiple participation” of participants. | 5 |
| Study preparation | 8 | Describe any preparation process before conducting the survey (e.g., interviewers’ training process, advertising the survey). | 4-5 |
| Ethical considerations | 9a | Provide information on ethical approval for the survey if obtained, including informed consent, institutional review board [IRB] approval, Helsinki declaration, and good clinical practice [GCP] declaration (as appropriate). | 4 |
| 9b | Provide information about survey anonymity and confidentiality and describe what mechanisms were used to protect unauthorized access. | 4 |
| Statistical  analysis | 10a | Describe statistical methods and analytical approach. Report the statistical software that was used for data analysis. | 5 |
| 10b | Report any modification of variables used in the analysis, along with reference (if available). | N/A |
| 10c | Report details about how missing data was handled. Include rate of missing items, missing data mechanism (i.e., missing completely at random [MCAR], missing at random [MAR] or missing not at random [MNAR]) and methods used to deal with missing data (e.g., multiple imputation). | 5 |
| 10d | State how non-response error was addressed. | 5 |
| 10e | For longitudinal surveys, state how loss to follow-up was addressed. | N/A |
| 10f | Indicate whether any methods such as weighting of items or propensity scores have been used to adjust for non-representativeness of the sample. | N/A |
| 10g | Describe any sensitivity analysis conducted. |  |
| **Results** | | |  |
| Respondent characteristics | 11a | Report numbers of individuals at each stage of the study. Consider using a flow diagram, if possible. | N/A |
| 11b | Provide reasons for non-participation at each stage, if possible. | N/A |
| 11c | Report response rate, present the definition of response rate or the formula used to calculate response rate. | 6 |
| 11d | Provide information to define how unique visitors are determined. Report number of unique visitors along with relevant proportions (e.g., view proportion, participation proportion, completion proportion). | N/A |
| Descriptive  results | 12 | Provide characteristics of study participants, as well as information on potential confounders and assessed outcomes. | 6 |
| Main findings | 13a | Give unadjusted estimates and, if applicable, confounder-adjusted estimates along with 95% confidence intervals and p-values. | 6-10 |
| 13b | For multivariable analysis, provide information on the model building process, model fit statistics, and model assumptions (as appropriate). | 8-10 |
| 13c | Provide details about any sensitivity analysis performed. If there are considerable amount of missing data, report sensitivity analyses comparing the results of complete cases with that of the imputed dataset (if possible). | N/A |
| **Discussion** | | |  |
| Limitations | 14 | Discuss the limitations of the study, considering sources of potential biases and imprecisions, such as non-representativeness of sample, study design, important uncontrolled confounders. | 13 |
| Interpretations | 15 | Give a cautious overall interpretation of results, based on potential biases and imprecisions and suggest areas for future research. | 10-13 |
| Generalizability | 16 | Discuss the external validity of the results. | 13 |
| **Other sections** | | |  |
| Role of funding source | 17 | State whether any funding organization has had any roles in the survey’s design, implementation, and analysis. | 14 |
| Conflict of interest | 18 | Declare any potential conflict of interest. | 14 |
| Acknowledgements | 19 | Provide names of organizations/persons that are acknowledged along with their contribution to the research. | N/A |

**S2: The Survey**

**Predatory Publishing Awareness among Dental Interns in Riyadh, Saudi Arabia: A Cross-Sectional Study**

Dear participant,

We are a research team at King Saud bin Abdulaziz University for Health Sciences conducting a study that aims to assess the awareness of predatory and open-access journals among dental interns in Riyadh, Saudi Arabia.

This short questionnaire will ask about your recent research behaviors and attitudes toward publishing in predatory and open-access journals. If you agree to participate, please fill out this questionnaire, which will take about 7–10 minutes.

Your responses will be anonymous and will not be shared with anyone except the research team. The results of this research will be reported in aggregate form, so your individual responses will not be identified. Your participation is voluntary, and you have the right not to complete the survey without any consequences.

If you have any questions regarding the research, please contact the principal investigator, Dr. Lubna Alkadi, at lubna.alkadi@gmail.com.

- **If you agree to participate in this survey, please select (I agree to participate).**
- I agree to participate
- I don’t agree to participate
- **Are you a dental intern in Riyadh, Saudi Arabia?**
- Yes, I am a dental intern in Riyadh, Saudi Arabia
- No, I am not a dental intern in Riyadh, Saudi Arabia

**Demographic Data**

1. **Gender:**

- Female
- Male

1. **Age in years:**

______________________

1. **Marital status:**

- Single
- Married
- Divorced
- Widowed

1. **Do you intend to be in academia?**

- Yes, I am planning to be in academia
- No, I am not planning to be in academia

1. **From which university did you graduate? (Select one)**

- King Saud bin Abdulaziz University for Health Sciences (KSAU-HS)
- King Saud University (KSU)
- Princess Nourah bint Abdulrahman University (PNU)
- Riyadh Elm University (REU)
- Vision College
- Dar Al Uloom University (DAU)

**Research/ Publication History**

1. **Are you currently interested in research conducting activities?**

- Yes
- No
- I don’t know

1. **How many papers have you published so far (as an author or co-author)?**

- 0
- 1
- 2
- 3
- 4 or more

1. **How many research papers have you published as a first author or corresponding author?**

- 0
- 1
- 2
- 3
- 4 or more

1. **How many research papers have you published in open-access journals?**

- 0
- 1
- 2
- 3
- 4 or more

**Predatory Journal Awareness**

For each statement below, select one option that best reflects how often it applies to you when considering journals for manuscript submission. Use the scale Always / Often / Sometimes / Rarely / Never.

| **Item** | **Always** | **Often** | **Sometimes** | **Rarely** | **Never** |
| --- | --- | --- | --- | --- | --- |
| 1. I critically check the name of an Open Access Journal before manuscript submission |  |  |  |  |  |
| 1. I verify the editorial board of an Open Access Journal before manuscript submission |  |  |  |  |  |
| 1. I check the peer review process of an Open Access Journal before manuscript submission |  |  |  |  |  |
| 1. I look up the COPE (Committee on Publication Ethics) membership of a journal before manuscript submission |  |  |  |  |  |
| 1. I prefer to publish in an open-access journal rather than in a subscription-based journal |  |  |  |  |  |
| 1. The authors pay the publishing fees of an open-access journal when the manuscript is accepted |  |  |  |  |  |
| 1. My employer/ workplace enables me to access literature published in subscription-based journals as needed |  |  |  |  |  |
| 1. I will be more frequently cited when I publish my research in a subscription-based journal |  |  |  |  |  |
| 1. Publishing fees are of secondary importance to me |  |  |  |  |  |
| 1. I know how to identify a potentially ‘predatory journal’ |  |  |  |  |  |
| 1. I prefer to publish in journals that are interested in recruiting me as an author via email |  |  |  |  |  |

1. **Are you familiar with the term “predatory Journal”?**

- Yes
- No

1. **Are you familiar with the “think, check, submit” approach?**

- Yes
- No

1. **Are you aware of Beall’s List?**

- Yes, I am aware of this term.
- No, I am not aware of this term.

1. **Do you receive invitations from journals to contribute to an article (Orig. Article, Review, Research Letter, etc)?**

- Yes
- No

1. **If yes, how many email invitations do you receive each month?**

- 1-2 email invitations.
- 3-4 email invitations.
- >5 email **invitations.**

1. **If yes, are any of these (as far as you are aware) from a ‘Predatory Journal’?**

- Yes
- No
- I do not know

1. **If yes, have you published your research within these journals?**

- Yes
- No
- I am not aware

1. **Reasons for submitting a manuscript to an Open Access Journal (select all that applies):**

- Publishing in an open-access journal is easier than publishing in a subscription-based journal.
- I wish my publication to be accessible to everybody. Therefore, I publish in Open Access Journals.
- My article will be more frequently cited when I publish it in an open-access journal
- The review process for Open Access Journals is faster than that of subscription-based journals.

1. **How would you characterize a ‘Predatory Journal’? (select all that applies)**

- Flashy journal name
- Journal is not indexed in an acceptable database such as Pubmed, Web of Science, Scopus, …etc)
- No impact factor
- Open access to all articles
- Low quality of the published articles
- No or insufficient peer review period
- No editorial board or no real persons at the editorial board
- Journal is located in a newly industrializing country
- Unprofessional journal layout
- High publication fees
- Rapid publication process
